# Supplementary material for: DFT and machine learning guided investigation into the design of new dual-atom catalysts based on α-2 graphyne
Source: Royal Society of Chemistry journal article supplement (doi:10.1039/d4cp03171g), 2024-01-01
Supplement: d4cp03171g1.pdf [file d4cp03171g1.pdf]

## Supporting Information

### DFT and Machine Learning Guided Investigation into the Design of Dual-Atom Catalysts on New $\alpha - 2$ Graphyne

Chandra Chowdhury\*<sup>1</sup>, Karthikraja Esackraj<sup>1,2</sup>

<sup>1</sup>Advanced Materials Laboratory,  
CSIR-Central Leather Research Institute (CSIR-CLRI),  
Sardar Patel Road, Adyar,  
Chennai 600 020, India  
Email: pc.chandra12@gmail.com

<sup>2</sup>Academy of Scientific and Innovative Research (AcSIR),  
Ghaziabad-201002, India

Venkatesan Subramanian<sup>2,3</sup>

<sup>3</sup>Indian Institute of Technology Madras,  
Sardar Patel Road, Adyar,  
Chennai 600 036, India

August 10, 2024

Table S1: Bond lengths ( $\text{\AA}$ ) of different DACs.

| <b>System</b> | <b>Bond Length (<math>\text{\AA}</math>)</b> |
|---------------|----------------------------------------------|
| Sc-Sc         | 3.1                                          |
| Sc-Ti         | 3.02                                         |
| Sc-V          | 3.01                                         |
| Sc-Cr         | 3.01                                         |
| Sc-Mn         | 3.08                                         |
| Sc-Fe         | 3.06                                         |
| Sc-Co         | 3.15                                         |
| Sc-Ni         | 3.31                                         |
| Sc-Cu         | 3.06                                         |
| Sc-Zn         | 2.78                                         |

Table S2: Amount of charge transfer from meta-metal dimer to surface. For example we have chosen here TiM complexes.

| <b>Metal (M)</b> | <b>TiM</b> |
|------------------|------------|
| Ti               | 2.92       |
| V                | 2.62       |
| Cr               | 2.48       |
| Mn               | 2.31       |
| Fe               | 1.98       |
| Co               | 1.95       |
| Ni               | 1.74       |
| Cu               | 1.75       |
| Zn               | 1.85       |

Table S3: Electronegativity of elements. Comparing the table with Table S2, it is seen that charge transfer from metal to system follows the electronegativity trend.

| <b>Element</b> | <b>Electronegativity</b> |
|----------------|--------------------------|
| Sc             | 1.36                     |
| Ti             | 1.54                     |
| V              | 1.63                     |
| Cr             | 1.66                     |
| Mn             | 1.55                     |
| Fe             | 1.83                     |
| Co             | 1.88                     |
| Ni             | 1.91                     |
| Cu             | 1.90                     |
| Zn             | 1.65                     |
| Y              | 1.22                     |
| Zr             | 1.33                     |
| Nb             | 1.60                     |
| Mo             | 2.16                     |
| Tc             | 1.90                     |
| Ru             | 2.20                     |
| Rh             | 2.28                     |
| Pd             | 2.20                     |
| Ag             | 1.93                     |
| Cd             | 1.69                     |
| Hf             | 1.30                     |
| Ta             | 1.50                     |
| W              | 2.36                     |
| Re             | 1.90                     |
| Os             | 2.20                     |
| Ir             | 2.20                     |
| Pt             | 2.28                     |
| Au             | 2.54                     |
| Hg             | 2.0                      |

Table S4: Metal bulk and gas phase energy results for the calculation of cohesive energies.

| Metal | EM, bulk | EM, gas | $\Delta E_{coh}$ -cal |
|-------|----------|---------|-----------------------|
| Sc    | -6.72    | -8.03   | -2.10                 |
| Ti    | -2.47    | -4.62   | -5.56                 |
| V     | -9.10    | -3.64   | -5.46                 |
| Cr    | -9.90    | -5.14   | -4.76                 |
| Mn    | -9.15    | -5.15   | -4.00                 |
| Fe    | -8.42    | -3.38   | -5.04                 |
| Co    | -7.12    | -1.83   | -5.29                 |
| Ni    | -5.48    | -1.25   | -4.23                 |
| Cu    | -4.02    | -0.24   | -3.78                 |
| Y     | -6.52    | -8.45   | -1.50                 |
| Zr    | -2.34    | -5.02   | -6.11                 |
| Nb    | -10.51   | -3.18   | -7.33                 |
| Mo    | -10.82   | -4.58   | -6.24                 |
| Tc    | -10.92   | -9.55   | -3.40                 |
| Ru    | -2.47    | -7.52   | -7.08                 |
| Rh    | -7.42    | -1.37   | -6.05                 |
| Pd    | -5.45    | -1.47   | -3.98                 |
| Ag    | -2.72    | -0.20   | -2.51                 |
| Hf    | -9.85    | -3.34   | -6.51                 |
| Ta    | -12.08   | -3.66   | -8.42                 |
| W     | -12.90   | -4.53   | -8.37                 |
| Re    | -12.93   | -4.61   | -8.32                 |
| Os    | -11.45   | -2.92   | -8.53                 |
| Ir    | -9.05    | -1.57   | -7.48                 |
| Pt    | -6.40    | -0.60   | -5.80                 |
| Au    | -3.25    | -0.18   | -3.0                  |
